# Supplementary material
Source: publisher site journal article supplement (https://static.cambridge.org/content/id/urn:cambridge.org:id:article:S1443964619000329/resource/name/S1443964619000329supp002.docx)
Supplement: Supplementary file 1 [file S1443964619000329supp002.docx]

**Supplementary Material 2**

Modified ORIC (adapted from Shea et al., 2014)

To what extent do you agree with each of the following statements?

Response scale:

| 1 Disagree | 2 Somewhat Disagree | 3 Neither Agree nor Disagree | 4 Somewhat Agree | 5 Agree |
| --- | --- | --- | --- | --- |

1. I feel confident that I can learn and implement new behaviour management interventions.
2. I am committed to learning and implementing new behaviour management interventions.
3. I feel confident that I can keep track of my progress in learning and implementing new behaviour management interventions.
4. I feel confident that my colleagues can support me in learning and implementing new behaviour management interventions.
5. I want to learn and implement new behaviour management interventions.
6. I feel confident that I can keep the momentum going in learning and implementing new behaviour management interventions.
7. I feel confident that I can handle the challenges that might arise in learning and implementing new behaviour management interventions.
8. I am determined to learn and implement new behaviour management interventions.
9. I feel confident that I can coordinate tasks so that the learning and implementation of new behaviour management interventions goes smoothly.
10. I am motivated to learn and implement new behaviour management interventions.
11. I feel confident that I can manage the potential politics of learning and implementing new behaviour management interventions.
